# Supplementary material
Source: PubMed Central journal article supplement (PMC546423)
Supplement: JCI0522710sd.pdf [file JCI0522710sd.pdf]

| UniGene                    | Clone ID   | Gene Name                                                                    | Little   | SOCS2-/- Little |
|----------------------------|------------|------------------------------------------------------------------------------|----------|-----------------|
| <b>Reduced genes by GH</b> |            |                                                                              |          |                 |
| Mm.1373                    | M200000541 | <b>PEROXISOME PROLIFERATOR ACTIVATED RECEPTOR ALPHA (PPAR-ALPHA)</b>         | -2.1993  | -3.4945         |
| Mm.21912                   | M200004250 | SIMILAR TO F-BOX ONLY PROTEIN 21, ISOFORM 1; F-BOX PROTEIN 21.               | -2.5685  | -3.4557         |
| Mm.21300                   | M200004104 | <b>INSULIN-LIKE GROWTH FACTOR BINDING PROTEIN 1 PRECURSOR (IGFBP-1)</b>      | -2.5070  | -3.2957         |
| Mm.142581                  | M200009401 | Cyp2c55: cytochrome P450, family 2, subfamily c, polypeptide 55              | 1.1370   | -3.0565         |
| Mm.22701                   | M200004483 | GROWTH-ARREST-SPECIFIC PROTEIN 1 (GAS-1).                                    | -2.5303  | -3.0424         |
| Mm.33344                   | M200016354 | DNA segment, Chr 14, ERATO Doi 449, expressed                                | -1.4459  | -2.8058         |
| Mm.41459                   | M200013605 | 2610039E05Rik: RIKEN cDNA 2610039E05 gene                                    | -14.1399 | -2.7951         |
| Mm.42040                   | M200013852 | ADENYLATE KINASE ISOENZYME 4, MITOCHONDRIAL (EC 2.7.4.3) (ATP-AMP TRANSP     | -1.5873  | -2.7568         |
| Mm.279932                  | M200004527 | B230342M21Rik: RIKEN cDNA B230342M21 gene                                    | -1.5574  | -2.6498         |
| Mm.3459                    | M200001342 | D-SITE-BINDING PROTEIN (ALBUMIN D BOX-BINDING PROTEIN).                      | -1.6602  | -2.5616         |
| Mm.28954                   | M200006246 | RAS HOMOLOG GENE FAMILY, MEMBER U; WNT1 RESPONSIVE CDC42 HOMOLOG.            | -1.3719  | -2.4762         |
| Mm.24510                   | M200004915 | SOLUTE CARRIER FAMILY 12 MEMBER 7 (ELECTRONEUTRAL POTASSIUM-CHLORIDE         | -1.5842  | -2.4294         |
| Mm.143717                  | M200009440 | NEURONAL GUANINE NUCLEOTIDE EXCHANGE FACTOR; TRANSFORMING IMMORTA            | -1.5125  | -2.3723         |
| Mm.21921                   | M200004253 | CDC42 EFFECTOR PROTEIN 4 (BINDER OF RHO GTPASE 4).                           | -1.8896  | -2.3436         |
| Mm.20889                   | M200003984 | CYTOCHROME P450 8B1 (EC 1.14.-.-) (CYPVIIIB1) (STEROL 12-ALPHA- HYDROXYLASE) | -1.0097  | -2.3134         |
| Mm.28943                   | M200006241 | 1300014I06Rik: RIKEN cDNA 1300014I06 gene                                    | -2.3705  | -2.3006         |
| Mm.10709                   | M200002974 | UDP-GLUCOSE 6-DEHYDROGENASE (EC 1.1.1.22) (UDP-GLC DEHYDROGENASE) (UDP-4     | -1.0978  | -2.2999         |
| Mm.103581                  | M200008547 | Slc23a2: Solute carrier family 23 (nucleobase transporters), member 2        | -1.4575  | -2.2246         |
| Mm.171314                  | M200016372 | Rgmc: RGM domain family, member C                                            | -1.6299  | -2.1992         |
| Mm.260031                  | M200016243 | CYTOCHROME P450 3A11 (EC 1.14.14.1) (CYP11A11) (P-450IIIAM1) (P- 450UT).     | 1.2140   | -2.1945         |
| Mm.24210                   | M200004828 | BRANCHED-CHAIN AMINO ACID AMINOTRANSFERASE, MITOCHONDRIAL PRECURSOR          | -2.1822  | -2.1610         |
| Mm.3634                    | M200001413 | GENE RICH CLUSTER, C3F GENE; PUTATIVE TRANSMEMBRANE PROTEIN PTG.             | -1.4274  | -2.1336         |
| Mm.252776                  | M200008744 | Prkcn: protein kinase C, nu                                                  | -2.2321  | -2.0956         |
| Mm.33669                   | M200007395 | CLAUDIN-1.                                                                   | -2.5173  | -2.0835         |
| Mm.14781                   | M200016234 | cytochrome P450, family 2, subfamily a, polypeptide 4                        | -1.1823  | -2.0457         |
| Mm.22216                   | M200004320 | GLUCOCORTICOID-INDUCED LEUCINE ZIPPER PROTEIN.                               | -1.6104  | -2.0373         |
| Mm.3077                    | M200001178 | ORPHAN NUCLEAR RECEPTOR NR1I3 (CONSTITUTIVE ANDROSTANE RECEPTOR) (CA         | -2.5519  | -2.0279         |
| Mm.210196                  | M200015909 | GLYCEROL-3-PHOSPHATE ACYLTRANSFERASE, MITOCHONDRIAL PRECURSOR (EC 2.         | -1.7306  | -2.0259         |
| Mm.41409                   | M200013582 | 0610039J01Rik: RIKEN cDNA 0610039J01 gene                                    | -1.7257  | -2.0022         |
| Mm.28921                   | M200006230 | CLAUDIN-3 (CLOSTRIDIUM PERFRINGENS ENTEROTOXIN RECEPTOR 2) (CPE- RECEPTOR)   | -1.7968  | -1.9864         |
| Mm.148155                  | M200009549 | malic enzyme, supernatant                                                    | 1.2541   | -1.9659         |
| Mm.272321                  | M200002801 | CBP/P300-INTERACTING TRANSACTIVATOR 2 (MSG-RELATED PROTEIN 1) (MRG1 PRO      | 1.0853   | -1.9657         |
| Mm.10211                   | M200002896 | ECTONUCLEOSIDE TRIPHOSPHATE DIPHOSPHOHYDROLASE 5 PRECURSOR (EC 3.6.1.6       | -1.1636  | -1.9638         |
| Mm.3484                    | M200001354 | NIEMANN-PICK C1 PROTEIN PRECURSOR.                                           | -1.1434  | -1.9486         |
| Mm.35444                   | M200007747 | SOLUTE CARRIER FAMILY 19 (THIAMINE TRANSPORTER), MEMBER 2.                   | -1.1201  | -1.9409         |
| Mm.4210                    | M200001638 | aldehyde dehydrogenase family 3, subfamily A2                                | -1.2798  | -1.9293         |
| Mm.34208                   | M200007515 | 1300018L09Rik: RIKEN cDNA 1300018L09 gene                                    | -1.2437  | -1.9200         |
| Mm.205266                  | M200013066 | Acaa1: Acetyl-Coenzyme A acyltransferase 1                                   | 1.0295   | -1.8918         |
| Mm.20801                   | M200003937 | HIV-1 TAT INTERACTIVE PROTEIN 2, HOMOLOG; TAT-INTERACTING PROTEIN 30 KDA     | -1.1663  | -1.8854         |
| Mm.181709                  | M200012017 | REGULATOR OF G-PROTEIN SIGNALING 16 (RGS16) (RETINALLY ABUNDANT REGULAT      | -1.3177  | -1.8793         |
| Mm.9075                    | M200002766 | EPOXIDE HYDROLASE 1 (EC 3.3.2.3) (MICROSOMAL EPOXIDE HYDROLASE) (EPOXIDE     | 1.1531   | -1.8748         |
| Mm.171314                  | M200012640 | Rgmc: RGM domain family, member C                                            | -1.6484  | -1.8733         |
| Mm.232636                  | M200015717 | 9130022K13Rik: RIKEN cDNA 9130022K13 gene                                    | -1.8434  | -1.8717         |
| Mm.28193                   | M200005876 | 1810031K17Rik: RIKEN cDNA 1810031K17 gene                                    | -1.6513  | -1.8583         |
| Mm.290534                  | M200006562 | BC003251: CDNA sequence BC003251                                             | -1.4969  | -1.8388         |
| Mm.214958                  | M200013337 | STEROL REGULATORY ELEMENT BINDING PROTEIN-1 (SREBP-1)                        | -2.4606  | -1.8366         |
| Mm.1025                    | M200016208 | NUCLEAR FACTOR ERYTHROID 2 RELATED FACTOR 2 (NF-E2 RELATED FACTOR 2)         | -1.3242  | -1.8255         |
| Mm.26539                   | M200005289 | Cyp4f15: cytochrome P450, family 4, subfamily f, polypeptide 15              | -1.7962  | -1.7976         |
| Mm.206218                  | M200013084 | HISTONE DEACETYLASE 11 (HD11).                                               | -1.3892  | -1.7771         |
| Mm.200905                  | M200012967 | CARBOHYDRATE KINASE-LIKE PROTEIN (EC 2.7.1.-).                               | -1.3910  | -1.7340         |
| Mm.104960                  | M200008685 | PROBABLE OXIDOREDUCTASE 0610038K03RIK.                                       | -1.2219  | -1.6957         |
| Mm.46011                   | M200014363 | RIKEN cDNA 2900063A19 gene                                                   | -1.4554  | -1.6904         |
| Mm.310                     | M200000111 | ring finger protein 103                                                      | -1.2153  | -1.6758         |
| Mm.36560                   | M200007868 | SIMILAR TO PROTOCADHERIN 1 (CADHERIN-LIKE 1) (FRAGMENT).                     | -1.9604  | -1.6743         |
| Mm.270278                  | M200003750 | THYROTROPH EMBRYONIC FACTOR ISOFORM 1.                                       | -1.6381  | -1.6675         |
| Mm.299                     | M200000107 | THIOETHER S-METHYLTRANSFERASE (EC 2.1.1.96) (TEM1).                          | -1.4358  | -1.6613         |

|           |            |                                                                                  |         |                      |
|-----------|------------|----------------------------------------------------------------------------------|---------|----------------------|
| Mm.2662   | M200001016 | GLUTATHIONE S-TRANSFERASE 5.7 (EC 2.5.1.18) (GST 5.7) (GST CLASS- ALPHA) (GST A  | 1.0029  | -1.6570              |
| Mm.36757  | M200007889 | RIKEN cDNA 2900026A02 gene                                                       | -1.6968 | -1.6565              |
| Mm.45565  | M200014283 | RIKEN cDNA 1810038L18 gene                                                       | -1.3044 | -1.6525              |
| Mm.42260  | M200013953 | HEPATOCTE NUCLEAR FACTOR 3-GAMMA (HNF-3G) (FORKHEAD BOX PROTEIN A3)              | -1.4353 | -1.6476              |
| Mm.41389  | M200013573 | KRUEPPEL-LIKE FACTOR 15 (CARDIOVASCULAR KRUPPEL-LIKE FACTOR).                    | -1.4373 | -1.6316              |
| Mm.183034 | M200012128 | SERINE/THREONINE KINASE 38; EXPRESSED SEQUENCE AA617404; 9530097A09RIK.          | -1.2840 | -1.6200              |
| Mm.63490  | M200015111 | LIVER CARBOXYLESTERASE 22 PRECURSOR (EC 3.1.1.1) (EGASYN) (ESTERASE- 22) (E      | 1.2701  | -1.6163              |
| Mm.426    | M200000159 | GLUTATHIONE S-TRANSFERASE P 2 (EC 2.5.1.18) (GST YF-YF) (GST-PIB) (GST CLASS-P   | -1.0908 | -1.6105              |
| Mm.194888 | M200014752 | ectonucleotide pyrophosphatase                                                   | -1.2612 | -1.6061              |
| Mm.73222  | M200015358 | 1700061J05Rik: RIKEN cDNA 1700061J05 gene                                        | -1.1655 | -1.6034              |
| Mm.181973 | M200012047 | Acbd5: acyl-Coenzyme A binding domain containing 5                               | -1.1376 | -1.5997              |
| Mm.2874   | M200001093 | <b>CORTICOSTEROID-BINDING GLOBULIN PRECURSOR (CBG) (TRANCORTIN).</b> [Sou        | -1.0022 | -1.5753              |
| Mm.22288  | M200004346 | cyclin D1                                                                        | 1.1247  | -1.5531              |
| Mm.34004  | M200007462 | ATP-BINDING CASSETTE, SUB-FAMILY G, MEMBER 5 (STEROLIN-1).                       | -1.6667 | -1.5383              |
| Mm.33729  | M200007403 | Slc25a22: solute carrier family 25 (mitochondrial carrier: glutamate), member 22 | -1.0468 | -1.5310              |
| Mm.24750  | M200004986 | VOLTAGE-DEPENDENT CALCIUM CHANNEL GAMMA-LIKE SUBUNIT                             | -1.5086 | -1.5247              |
| Mm.54981  | M200014785 | 2810459M11Rik: RIKEN cDNA 2810459M11 gene                                        | -1.4136 | -1.5142              |
| Mm.247530 | M200012930 | LIM AND SH3 DOMAIN PROTEIN 1 (LASP-1) (MLN 50).                                  | -1.5038 | -1.5103              |
| Mm.21202  | M200004084 | 2400009B11Rik: RIKEN cDNA 2400009B11 gene                                        | -1.3651 | -1.4937              |
| Mm.170461 | M200011659 | Arhgef18: rho/rac guanine nucleotide exchange factor (GEF) 18                    | -1.3105 | -1.4628              |
| Mm.153372 | M200009671 | BRCA1 ASSOCIATED PROTEIN; RIKEN CDNA 3010002G07 GENE.                            | -1.4542 | -1.4599              |
| Mm.13000  | M200003223 | HISTIDINE AMMONIA-LYASE (EC 4.3.1.3) (HISTIDASE).                                | -1.3544 | -1.4590              |
| Mm.10288  | M200002913 | POTENTIAL PHOSPHOLIPID-TRANSPORTING ATPASE IIA (EC 3.6.3.1).                     | -1.1505 | -1.4519              |
| Mm.29460  | M200006493 | ADENYLATE KINASE ISOENZYME 2, MITOCHONDRIAL (EC 2.7.4.3)                         | -1.1763 | -1.4127              |
| Mm.170023 | M200011657 | cDNA sequence BC014685                                                           | -1.6408 | -1.3673              |
| Mm.259191 | M200013110 | O-LINKED N-ACETYLGLUCOSAMINE (GLCNAC) TRANSFERASE                                | -1.6935 | -1.3667              |
| Mm.3308   | M200001279 | tyrosine 3-monooxygenase                                                         | 1.2494  | -1.2502              |
| Mm.24551  | M200004927 | Lims2: LIM and senescent cell antigen like domains 2                             | -2.0205 | -1.2371              |
| Mm.29382  | M200006461 | 1110038D17Rik: RIKEN cDNA 1110038D17 gene                                        | -1.5242 | -1.2254              |
| Mm.246377 | M200012274 | tubulin, beta 2                                                                  | -1.5273 | -1.2206              |
| Mm.178246 | M200011854 | Chd3: chromodomain helicase DNA binding protein 3                                | -1.5007 | -1.0571              |
| Mm.28326  | M200005943 | D8Ert354e: DNA segment, Chr 8, ERATO Doi 354, expressed                          | -1.4549 | (-).1.03209580991303 |

#### Induced genes by GH

|           |            |                                                                        |         |         |
|-----------|------------|------------------------------------------------------------------------|---------|---------|
| Mm.9653   | M200002810 | <b>GROWTH ARREST AND DNA-DAMAGE-INDUCIBLE PROTEIN GADD45 GAMMA</b>     | 9.7522  | 17.3770 |
| Mm.31403  | M200016283 | TNFA-INDUCED ADIPOSE-RELATED PROTEIN.                                  | 9.6152  | 14.9302 |
| Mm.46067  | M200013505 | 4933433D23Rik: RIKEN cDNA 4933433D23 gene                              | 7.1301  | 9.4209  |
| Mm.56     | M200000018 | CALCIPRESSIN 1 (DOWN SYNDROME CRITICAL REGION PROTEIN 1 HOMOLOG)       | 5.6820  | 7.4921  |
| Mm.22718  | M200004492 | X-BOX BINDING PROTEIN 1; DNA SEGMENT, CHR 11, ERATO DOI 39, EXPRESSED. | 4.8991  | 6.2682  |
| Mm.8534   | M200002716 | <b>EPIDERMAL GROWTH FACTOR RECEPTOR PRECURSOR (EC 2.7.1.112).</b>      | 2.9951  | 6.2115  |
| Mm.4919   | M200002032 | DNA segment, human D4S114                                              | 6.8766  | 5.9712  |
| Mm.24769  | M200004993 | INTERFERON GAMMA INDUCIBLE PROTEIN; INTERFERON GAMMA INDUCIBLE PROT    | 3.7211  | 5.8274  |
| Mm.15793  | M200003398 | T-CELL SPECIFIC GTPASE.                                                | -1.2378 | 4.7545  |
| Mm.147226 | M200009417 | METALLOTHIONEIN-II (MT-II).                                            | 3.9213  | 4.6535  |
| Mm.200941 | M200012976 | SERUM AMYLOID A-2 PROTEIN PRECURSOR                                    | 6.1305  | 4.6378  |
| Mm.67721  | M200015229 | SALVADOR HOMOLOG 1; WW DOMAIN-CONTAINING PROTEIN 3;                    | 4.1053  | 4.5787  |
| Mm.216438 | M200009965 | Mus musculus, clone IMAGE:5123675, mRNA                                | 3.1285  | 4.4913  |
| Mm.116687 | M200008807 | Z-DNA BINDING PROTEIN 1 (TUMOR STROMA AND ACTIVATED MACROPHAGE PROT    | -1.5702 | 4.3889  |
| Mm.87072  | M200015801 | SIMILAR TO COMPLEMENT COMPONENT 8, BETA POLYPEPTIDE (FRAGMENT).        | 1.9334  | 4.1675  |
| Mm.200220 | M200012865 | RIKEN cDNA A230106A15 gene                                             | 3.9045  | 4.1027  |
| Mm.140811 | M200009318 | 3 BETA-HYDROXYSTEROID DEHYDROGENASE/DELTA 5-->4-ISOMERASE TYPE I (3BET | 2.4506  | 4.0476  |
| Mm.30018  | M200006785 | SERINE/THREONINE-PROTEIN KINASE PIM-3 (EC 2.7.1.37).                   | 2.4189  | 3.9310  |
| Mm.10303  | M200002919 | NUCLEOLAR PROTEIN 5; SIK SIMILAR PROTEIN.                              | 3.9533  | 3.9241  |
| Mm.858    | M200000303 | INTERFERON-G INDUCED GTPASE.                                           | 1.1019  | 3.7874  |
| Mm.246478 | M200012140 | RIKEN cDNA 2310043N10 gene                                             | 1.4412  | 3.7722  |
| Mm.21679  | M200004189 | MITOGEN-INDUCIBLE GENE 6 PROTEIN HOMOLOG (MIG-6).                      | 1.7265  | 3.6803  |
| Mm.15622  | M200003386 | BETA-1,4-GALACTOSYLTRANSFERASE 1 (EC 2.4.1.-) (BETA-1,4-GALTASE 1)     | 2.9746  | 3.5630  |
| Mm.3117   | M200001196 | PLECKSTRIN HOMOLOGY-LIKE DOMAIN, FAMILY A, MEMBER 1;                   | 3.5306  | 3.4256  |

|           |            |                                                                                |         |        |
|-----------|------------|--------------------------------------------------------------------------------|---------|--------|
| Mm.153625 | M200006060 | LIPIN 1 (FATTY LIVER DYSTROPHY PROTEIN).                                       | 2.8322  | 3.4019 |
| Mm.22716  | M200004491 | Slc43a1: solute carrier family 43, member 1                                    | 2.1895  | 3.3410 |
| Mm.143689 | M200009437 | LONG-CHAIN-FATTY-ACID--COA LIGASE 4 (EC 6.2.1.3)                               | 1.9304  | 3.2912 |
| Mm.22522  | M200004414 | METHYL-CPG BINDING DOMAIN PROTEIN 1.                                           | 2.8524  | 3.1753 |
| Mm.259026 | M200007079 | 2700078E11Rik: RIKEN cDNA 2700078E11 gene                                      | 1.5177  | 3.1717 |
| Mm.182442 | M200016386 | KIDNEY EXPRESSED GENE 1.                                                       | 6.1176  | 3.1629 |
| Mm.41800  | M200013755 | NUCLEOLAR GTP-BINDING PROTEIN 1 (CHRONIC RENAL FAILURE GENE PROTEIN)           | 2.3388  | 3.1042 |
| Mm.258484 | M200005650 | PROTEIN FAM3C PRECURSOR.                                                       | 1.5023  | 3.0445 |
| Mm.22650  | M200004460 | <b>Serine (or cysteine) proteinase inhibitor, clade A, member 3N (Spi 2.2)</b> | 1.7122  | 2.9721 |
| Mm.176946 | M200011815 | LEUCINE-RICH ALPHA-2-GLYCOPROTEIN;                                             | 1.1655  | 2.9636 |
| Mm.29938  | M200006739 | INTERFERON INDUCIBLE PROTEIN 1.                                                | 1.3761  | 2.8778 |
| Mm.202727 | M200006184 | PRE-B-CELL COLONY-ENHANCING FACTOR.                                            | 2.2279  | 2.8211 |
| Mm.253736 | M200009829 | PALMDELPHIN; PARALEMMIN-RELATED.                                               | 1.7818  | 2.7556 |
| Mm.196290 | M200012614 | 5830411E10Rik: RIKEN cDNA 5830411E10 gene                                      | 2.6942  | 2.7072 |
| Mm.280254 | M200002915 | Abhd5: abhydrolase domain containing 5                                         | 2.6991  | 2.7056 |
| Mm.78861  | M200015507 | NUCLEOLAR AND COILED-BODY PHOSPHOPROTEIN 1;                                    | 2.1536  | 2.6428 |
| Mm.28340  | M200005953 | fibrinogen-like protein 1                                                      | -1.4784 | 2.6120 |
| Mm.34871  | M200000601 | DNA-BINDING PROTEIN INHIBITOR ID-2.                                            | 1.5651  | 2.5295 |
| Mm.2668   | M200001019 | PROTEIN-TYROSINE PHOSPHATASE, NON-RECEPTOR TYPE 1 (EC 3.1.3.48)                | 1.7775  | 2.5074 |
| Mm.896    | M200000319 | INTERLEUKIN-1 RECEPTOR, TYPE 1 PRECURSOR (IL-1R-1) (P80)                       | 2.1471  | 2.4438 |
| Mm.52526  | M200004955 | 2810439F02Rik: RIKEN cDNA 2810439F02 gene                                      | 1.7213  | 2.4404 |
| Mm.181959 | M200012044 | EARLY GROWTH RESPONSE PROTEIN 1 (EGR-1) (KROX-24 PROTEIN) (ZIF268)             | 2.4585  | 2.4352 |
| Mm.12723  | M200003116 | ADP-RIBOSYLATION FACTOR-LIKE PROTEIN 4.                                        | 1.5429  | 2.3509 |
| Mm.175612 | M200011793 | CYCLIN ANIA-6A; RIKEN CDNA 2610030E23 GENE.                                    | 2.0218  | 2.3217 |
| Mm.24873  | M200005022 | nucleolar protein family A, member 1 (H                                        | 1.6057  | 2.2692 |
| Mm.4481   | M200001766 | INTERLEUKIN-17 RECEPTOR PRECURSOR (IL-17 RECEPTOR).                            | 2.1786  | 2.2083 |
| Mm.3468   | M200001348 | <b>SUPPRESSOR OF CYTOKINE SIGNALING 3 (SOCS-3)</b>                             | 1.7172  | 2.1996 |
| Mm.30063  | M200006814 | <b>FIBRINOGEN B-BETA-CHAIN (FRAGMENT).</b>                                     | 1.5423  | 2.1783 |
| Mm.16422  | M200003433 | <b>Fgg: Fibrinogen, gamma polypeptide</b>                                      | 1.5282  | 2.1719 |
| Mm.21119  | M200004061 | LPS-INDUCED TN FACTOR; TBX1 PROTEIN; NEDD4 WW DOMAIN-BINDING PROTEIN 3         | 1.4448  | 2.1632 |
| Mm.268521 | M200001048 | <b>INSULIN-LIKE GROWTH FACTOR IA PRECURSOR (IGF-IA) (SOMATOMEDIN).</b>         | 1.1226  | 2.1603 |
| Mm.1167   | M200000423 | TRANSCRIPTION FACTOR JUN-B.                                                    | 1.9849  | 2.1563 |
| Mm.149870 | M200004427 | 1200010C09Rik: RIKEN cDNA 1200010C09 gene                                      | 1.1452  | 2.1348 |
| Mm.103986 | M200006683 | 0610008N23Rik: RIKEN cDNA 0610008N23 gene                                      | 1.7249  | 2.1126 |
| Mm.143141 | M200009430 | EUKARYOTIC TRANSLATION INITIATION FACTOR 1A (EIF-1A) (EIF-4C).                 | 1.5044  | 2.1081 |
| Mm.28373  | M200005970 | BAG-FAMILY MOLECULAR CHAPERONE REGULATOR-3 (BCL-2 BINDING ATHANOGEL            | 1.7497  | 2.0957 |
| NM_007539 | M200014921 | B1 BRADYKININ RECEPTOR (BK-1 RECEPTOR) (B1R).                                  | 1.2377  | 2.0869 |
| Mm.22030  | M200004274 | Hoxa1 regulated gene                                                           | 1.5477  | 2.0588 |
| Mm.278808 | M200005914 | AA408582: expressed sequence AA408582                                          | 1.8272  | 2.0540 |
| Mm.8362   | M200002704 | nicotinamide N-methyltransferase                                               | 1.2091  | 2.0301 |
| Mm.276229 | M200009428 | Fbxo30: F-box protein 30                                                       | 1.7317  | 2.0287 |
| Mm.213003 | M200013247 | MYELOID DIFFERENTIATION PRIMARY RESPONSE PROTEIN MYD88.                        | 2.0109  | 2.0161 |
| Mm.39053  | M200008156 | ADAPTOR-RELATED PROTEIN COMPLEX 2, BETA 1 SUBUNIT; RIKEN CDNA 130001200        | 1.2617  | 2.0034 |
| Mm.3819   | M200011686 | Cox7a2: cytochrome c oxidase, subunit VIIa 2                                   | 1.6865  | 1.9956 |
| Mm.180157 | M200011929 | 28 KDA INTERFERON RESPONSIVE PROTEIN.                                          | 1.3857  | 1.9927 |
| Mm.117068 | M200008867 | CLAUDIN-2.                                                                     | 1.3822  | 1.9919 |
| Mm.131130 | M200002987 | CASPASE-8 PRECURSOR (EC 3.4.22.-).                                             | 1.8390  | 1.9824 |
| Mm.3489   | M200001359 | SERUM AMYLOID A-4 PROTEIN PRECURSOR (AMYLOID A-5 PROTEIN).                     | 1.3692  | 1.9791 |
| Mm.28858  | M200006199 | Cklfs6: chemokine-like factor super family 6                                   | 1.4770  | 1.9591 |
| Mm.45558  | M200014281 | INTERFERON-INDUCED 35 KDA PROTEIN HOMOLOG (IFP 35).                            | 1.3685  | 1.9232 |
| Mm.29352  | M200006444 | UBIQUITIN-CONJUGATING ENZYME E2 G2 (EC 6.3.2.19)                               | 1.4982  | 1.9206 |
| Mm.212696 | M200013230 | PROTEOGLYCAN 4 (MEGAKARYOCYTE STIMULATING FACTOR, ARTICULAR SUPERF             | 1.1130  | 1.9066 |
| Mm.277299 | M200012725 | RIKEN cDNA 1200016E24 gene                                                     | 3.0478  | 1.8988 |
| Mm.6824   | M200002436 | N-SULFOTRANSFERASE; AMINE N-SULFOTRANSFERASE; TYROSINE-ESTER SULFOTR           | 1.5756  | 1.8769 |
| Mm.12193  | M200003073 | SIMILAR TO 60S RIBOSOMAL PROTEIN L30 ISOLOG.                                   | 1.3112  | 1.8700 |
| Mm.21549  | M200004156 | ALPHA CRYSTALLIN C CHAIN (SMALL STRESS PROTEIN-LIKE PROTEIN HSP22).            | 1.0857  | 1.8531 |
| Mm.171346 | M200011700 | RIKEN cDNA A430105J06 gene                                                     | 1.7035  | 1.8518 |
| Mm.28908  | M200006222 | A DISINTEGRIN AND METALLOPROTEASE DOMAIN 9 (MELTRIN GAMMA); MELTRIN C          | 1.7109  | 1.8053 |

|           |            |                                                                                    |         |        |
|-----------|------------|------------------------------------------------------------------------------------|---------|--------|
| Mm.11223  | M200003031 | XANTHINE DEHYDROGENASE/OXIDASE                                                     | 1.5974  | 1.8036 |
| Mm.196153 | M200012561 | cAMP-regulated guanine nucleotide exchange factor II                               | 2.0600  | 1.7944 |
| Mm.275948 | M200004211 | INTERFERON ALPHA RESPONSIVE;                                                       | 1.4258  | 1.7908 |
| Mm.261182 | M200012113 | 2310061B02Rik: RIKEN cDNA 2310061B02 gene                                          | 1.3155  | 1.7756 |
| Mm.231400 | M200007891 | 1500003O22Rik: RIKEN cDNA 1500003O22 gene                                          | 1.4918  | 1.7736 |
| Mm.33484  | M200007373 | EGL NINE HOMOLOG 3 (C. ELEGANS);                                                   | 2.1064  | 1.7645 |
| Mm.35071  | M200007704 | RIKEN cDNA C730036D15 gene                                                         | 1.0158  | 1.7596 |
| Mm.27454  | M200005561 | PHOSPHORIBOSYL PYROPHOSPHATE SYNTHETASE 1.                                         | 1.2969  | 1.7546 |
| Mm.182114 | M200012059 | ADP-RIBOSYLATION FACTOR-LIKE PROTEIN 1. ]                                          | 1.4263  | 1.7506 |
| Mm.246803 | M200009768 | SWI/SNF RELATED, MATRIX ASSOCIATED, ACTIN DEPENDENT REGULATOR OF CHRC              | 1.8876  | 1.7394 |
| Mm.158852 | M200010506 | MITOCHONDRIAL IMPORT INNER MEMBRANE TRANSLOCASE SUBUNIT TIM9 A.                    | 1.6043  | 1.7384 |
| Mm.288742 | M200006794 | Rg9mtd1: RNA (guanine-9-) methyltransferase domain containing 1                    | 1.5597  | 1.7357 |
| Mm.21935  | M200004256 | SIGNAL TRANSDUCER AND ACTIVATOR OF TRANSCRIPTION 2.                                | 1.0800  | 1.7297 |
| Mm.273986 | M200007845 | D4Bwg0951e: DNA segment, Chr 4, Brigham & Women's Genetics 0951 expressed          | 1.5247  | 1.7276 |
| Mm.882    | M200000314 | INTERLEUKIN-1 RECEPTOR ANTAGONIST PROTEIN PRECURSOR (IL-1RA) (IL-1RN) (IR.         | 1.9404  | 1.7209 |
| Mm.3815   | M200001461 | SYNDECAN-4 PRECURSOR (RYUDOCAN CORE PROTEIN).                                      | 1.3283  | 1.7144 |
| Mm.10508  | M200002937 | LUPUS LA PROTEIN HOMOLOG (LA RIBONUCLEOPROTEIN)                                    | 1.1675  | 1.7081 |
| Mm.4863   | M200002002 | CCAAT                                                                              | 1.6139  | 1.7017 |
| Mm.4517   | M200001789 | INTER-ALPHA-TRYPSIN INHIBITOR HEAVY CHAIN H3 PRECURSOR (ITI HEAVY CHAIN            | -1.6092 | 1.6998 |
| Mm.24839  | M200005013 | enigma homolog (R. norvegicus)                                                     | 1.3779  | 1.6861 |
| Mm.482    | M200000177 | TRANSCRIPTION FACTOR AP-1 (ACTIVATOR PROTEIN 1) (AP1) (PROTO-ONCOGENE C-           | 1.7368  | 1.6773 |
| Mm.249131 | M200004036 | 6-PHOSPHOFRUCTO-2-KINASE/FRUCTOSE-2,6-BIPHOSPHATASE 1 (6PF-2-K/FRU- 2,6-P2.        | 1.3304  | 1.6700 |
| Mm.87658  | M200015892 | FORMIN BINDING PROTEIN 3; FORMIN BINDING PROTEIN 11.                               | 1.0601  | 1.6621 |
| Mm.18571  | M200003641 | BUTYRATE RESPONSE FACTOR 1 (TIS11B PROTEIN).                                       | 1.6484  | 1.6550 |
| Mm.21671  | M200004188 | Similar to eukaryotic translation initiation factor 3, subunit 9 (LOC381684), mRNA | 1.2915  | 1.6461 |
| Mm.12848  | M200003148 | signal recognition particle 54                                                     | 1.5292  | 1.6419 |
| Mm.14064  | M200003261 | METHIONINE ADENOSYLTRANSFERASE 1, ALPHA; S-ADENOSYLMETHIONINE SYNTH                | 1.0898  | 1.6338 |
| Mm.71015  | M200015304 | SIMILAR TO FOR PROTEIN DISULFIDE ISOMERASE-RELATED.                                | 1.3654  | 1.6206 |
| Mm.196325 | M200012632 | A730098D12Rik: RIKEN cDNA A730098D12 gene                                          | 1.2891  | 1.6144 |
| Mm.29778  | M200006651 | ARMET PROTEIN PRECURSOR.                                                           | 1.1248  | 1.5986 |
| Mm.247287 | M200012282 | TRANSMEMBRANE 4 SUPERFAMILY, MEMBER 7.                                             | 1.2967  | 1.5985 |
| Mm.258508 | M200011988 | 0610007L01Rik: RIKEN cDNA 0610007L01 gene                                          | 1.4531  | 1.5891 |
| Mm.257762 | M200009274 | 2610318G08Rik: RIKEN cDNA 2610318G08 gene                                          | 1.6497  | 1.5848 |
| Mm.291757 | M200007993 | 0610009I22Rik: RIKEN cDNA 0610009I22 gene                                          | 1.5470  | 1.5750 |
| Mm.117055 | M200008866 | CGI-100-LIKE PROTEIN; RIKEN CDNA 3110020018.                                       | 1.5876  | 1.5737 |
| Mm.263124 | M200002687 | LYMPHOCYTE ANTIGEN LY-6A.2/LY-6E.1 PRECURSOR (T-CELL-ACTIVATING PROTEIN            | -1.2752 | 1.5514 |
| Mm.36769  | M200007892 | SARCOLEMMMA ASSOCIATED PROTEIN; SARCOLEMMAL-ASSOCIATED PROTEIN.                    | 1.6276  | 1.5369 |
| Mm.88188  | M200015922 | DEAD-BOX PROTEIN 3 (DEAD-BOX RNA HELICASE DEAD3) (MDEAD3)                          | 1.3259  | 1.5319 |
| Mm.20866  | M200003969 | NIBRIN.                                                                            | 1.4625  | 1.5302 |
| Mm.139166 | M200015259 | AF155546: cDNA sequence AF155546                                                   | -1.0288 | 1.5206 |
| Mm.173953 | M200014723 | SMC6 PROTEIN.                                                                      | 1.3719  | 1.5206 |
| Mm.19039  | M200003723 | glutamate oxaloacetate transaminase 1, soluble                                     | 1.1972  | 1.5170 |
| Mm.30866  | M200007014 | cDNA sequence BC003965                                                             | 1.1226  | 1.5160 |
| Mm.259282 | M200001932 | LEPTIN RECEPTOR PRECURSOR (LEP-R) (OB RECEPTOR) (OB-R) (B219).                     | 1.1460  | 1.5119 |
| Mm.21062  | M200004042 | C87860: expressed sequence C87860                                                  | 1.7009  | 1.5038 |
| Mm.38233  | M200008031 | Similar to PTK9 protein tyrosine kinase 9 (LOC233637), mRNA                        | 1.0789  | 1.5005 |
| Mm.268334 | M200006528 | ATP-BINDING CASSETTE PROTEIN (FRAGMENT). [                                         | 1.2315  | 1.4948 |
| Mm.12950  | M200003204 | GANGLIOSIDE-INDUCED DIFFERENTIATION-ASSOCIATED-PROTEIN 10.                         | 1.3737  | 1.4946 |
| Mm.29924  | M200006732 | ARL-6 INTERACTING PROTEIN-1 (AIP-1) (TBX2 PROTEIN).                                | 1.5489  | 1.4864 |
| Mm.1856   | M200000717 | MACROPHAGE RECEPTOR MARCO (MACROPHAGE RECEPTOR WITH COLLAGENOUS                    | -1.2510 | 1.4711 |
| Mm.30043  | M200006800 | MICROSOMAL SIGNAL PEPTIDASE 25 KDA SUBUNIT (EC 3.4.-.-) (SPASE 25 KDA SUBUN        | 1.0188  | 1.4662 |
| Mm.369    | M200000130 | ATP-BINDING CASSETTE, SUB-FAMILY A, MEMBER 1 (ATP-BINDING CASSETTE TRAN            | 1.6453  | 1.4652 |
| Mm.28767  | M200006157 | C-REACTIVE PROTEIN PRECURSOR.                                                      | 1.4008  | 1.4642 |
| Mm.24611  | M200004946 | VITAMIN K-DEPENDENT PROTEIN S PRECURSOR.                                           | -1.0462 | 1.4158 |
| Mm.4094   | M200001590 | cytochrome P450, family 3, subfamily a, polypeptide 13                             | -1.1341 | 1.3945 |
| Mm.2672   | M200001020 | ALPHA-1,3-MANNOSYL-GLYCOPROTEIN 2-BETA-N-ACETYLGLUCOSAMINYLTRANSFI                 | 1.4562  | 1.3944 |
| Mm.998    | M200000364 | presenilin 1                                                                       | -1.0449 | 1.3837 |
| Mm.27308  | M200012686 | ADP-RIBOSYLATION FACTOR 6.                                                         | 1.3403  | 1.2749 |

|           |            |                                                    |         |        |
|-----------|------------|----------------------------------------------------|---------|--------|
| Mm.142843 | M200009424 | 5031400M07Rik: RIKEN cDNA 5031400M07 gene          | 1.4612  | 1.2274 |
| Mm.22505  | M200004406 | PUTATIVE STEROID DEHYDROGENASE KIK-I (EC 1.1.1.-). | 1.5047  | 1.2008 |
| Mm.993    | M200000362 | DEAH (Asp-Glu-Ala-His) box polypeptide 15          | 1.5628  | 1.0836 |
| Mm.22508  | M200004408 | METAXIN 1.                                         | -1.2798 | 1.0042 |

## Supplementary Table 1

Change in gene expression in hepatic tissue between *SOCS2*<sup>+/+</sup> *Ghrhr*<sup>lit/lit</sup> and *SOCS2*<sup>-/-</sup> *Ghrhr*<sup>lit/lit</sup> mice in response to GH. Microarray and statistical analysis were performed as described in Materials and Methods. The data represent the average of four individual hybridisations per group and are shown as fold-time induction or reduction by the GH treatment. Genes shown in bold are previously recognised GH-regulated genes. The sign (-) indicates down regulation.
